# Supplementary material for: A novel photosensitizer: An l-glutamide lipid conjugate with improved properties for photodynamic therapy
Source: Royal Society of Chemistry journal article supplement (doi:10.1039/c6pp00304d), 2016-11-07

Supplementary Fig. 1: Fluorescence spectra of free PS, PSL and LPSL in PBS.

Stock solution of free PS was made in DMSO and diluted by 100-fold to obtain the spectrum.

The fluorescence spectra are staggered to show that the emission maximum is not altered in different preparations.

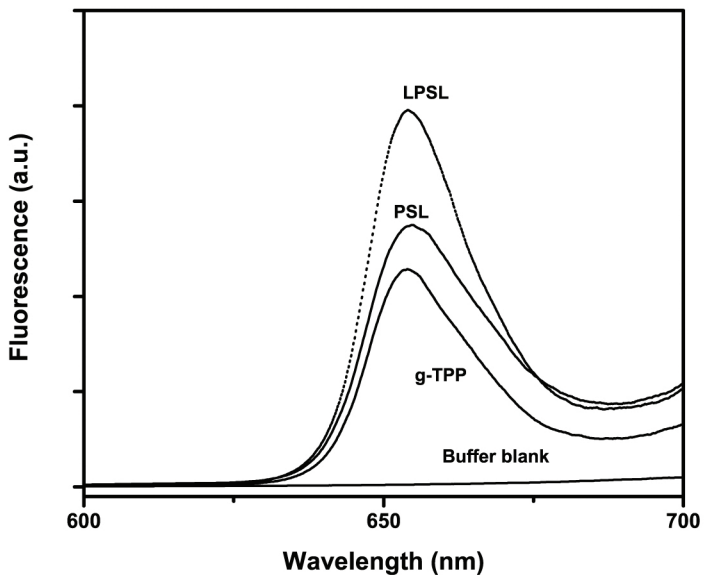

**Supplementary Fig. 2 ( Novel photosensitizer... by Nathan et.al.)**

Cell viability, assessed in a MTT assay, of SK-OV-3 cells in the presence of PSL (A) and LPSL(B). The red lines indicates absorbance values obtained in dark treatment and black lines indicated values obtained in light treatment.

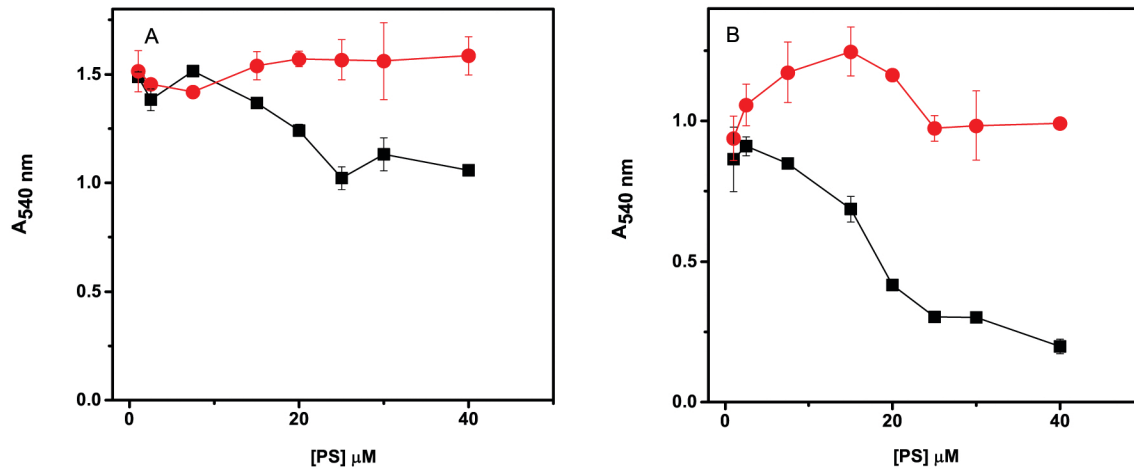

Supplement: c6pp00304d1.pdf [file c6pp00304d1.pdf]
